# Supplementary material for: Corallimorpharians are not “naked corals”: insights into relationships between Scleractinia and Corallimorpharia from phylogenomic analyses
Source: PeerJ. 2016 Oct 11;4:e2463. doi: 10.7717/peerj.2463 (PMC5068439; doi:10.7717/peerj.2463)
Supplement: Table S5 — List of genes used in this study and their annotations. [file peerj-04-2463-s009.xls]

## Sheet: 291genelist
Table S3. Encoding proteins of the studied genes.
GeneID	% identity	evalue	bit score	Description
gene11	59.18	0	868	importin-5
gene18	81.61	0	1035	cullin-1-like
gene22	66.67	7.2	35	ubiquitin carboxyl-terminal hydrolase 44
gene27	62.78	2e-98	318	structural maintenance of chromosomes protein 1A-like, partial
gene35	65.23	3e-106	336	exportin-2-like
gene41	57	0	719	calcium-dependent secretion activator 2
gene59	49.46	0	841	ubiquitin conjugation factor E4 B
gene61	72	0	743	pre-mRNA-processing factor 19
gene65	53.93	2e-19	95.5	nuclear pore complex protein Nup205-like, partial
gene66	71.76	0	814	60 kDa heat shock protein, mitochondrial
gene68	92.71	3e-56	188	translation elongation factor 1-alpha, partial
gene70	92.86	3e-16	87	cullin-4B-like
gene89	52.62	0	696	alpha-N-acetylglucosaminidase
gene99	52	6e-143	437	leishmanolysin-like peptidase-like
gene103	73.29	0	655	growth arrest-specific protein 8 isoform X2
gene123	49.02	7e-06	52.4	protein diaphanous homolog 1 isoform X2
gene124	64.11	1e-125	394	LOW QUALITY PROTEIN: ATP-binding cassette sub-family D member 1
gene149	72.05	0	556	mitogen-activated protein kinase 15-like
gene151	70	0	658	6-phosphogluconate dehydrogenase, decarboxylating
gene154	72.15	4e-30	127	uncharacterized protein LOC102208666
gene156	71.22	0	617	dihydropyrimidinase
gene157	62.47	2e-157	487	serine/threonine-protein kinase/endoribonuclease IRE1
gene163	68.25	3e-21	95.9	coiled-coil domain-containing protein 93-like
gene164	80.69	4e-134	414	tRNA wybutosine-synthesizing protein 1 homolog
gene166	61.78	6e-72	258	protein transport protein Sec24D
gene167	60.71	0.005	42.7	protein PTHB1-like
gene170	78.59	0	556	actin-related protein 2
gene181	93.3	3e-159	453	casein kinase I isoform alpha
gene182	63.66	0	547	aspartate--tRNA ligase, cytoplasmic
gene195	88.24	6e-33	127	BTB/POZ domain-containing protein KCTD3-like
gene200	77.78	3e-38	152	F-box/WD repeat-containing protein 7-like
gene204	48.7	0	577	collagen type IV alpha-3-binding protein
gene211	40.76	2e-36	150	chromosome-associated kinesin KIF4A
gene216	69.9	0	579	betaine--homocysteine S-methyltransferase 1-like
gene218	48.62	0	561	alpha-(1,6)-fucosyltransferase-like
gene219	62.44	5e-83	276	ubiquitin carboxyl-terminal hydrolase 15
gene237	88.89	0.57	36.6	dephospho-CoA kinase
gene247	78.43	8e-15	82.4	macoilin
gene251	64.74	2e-148	478	zinc finger SWIM domain-containing protein 5 isoform X2
gene256	76.67	3e-07	56.2	GDP-Man:Man(3)GlcNAc(2)-PP-Dol alpha-1,2-mannosyltransferase isoform X2
gene257	69.43	4e-179	519	acetoacetyl-CoA synthetase
gene274	75.41	3e-23	102	uncharacterized protein LOC102159053, partial
gene275	85.33	2e-142	420	casein kinase I isoform gamma-2-like
gene281	62.4	9e-160	469	GTP-binding protein 2
gene284	46.58	6e-158	471	negative elongation factor B-like
gene286	61.54	6e-14	72.8	importin subunit alpha-1-like, partial
gene291	67.8	1e-15	84	olfactory receptor 226-like
gene305	62.26	5e-180	520	putative aminopeptidase W07G4.4-like
gene307	69.8	3e-131	386	hypothetical protein AMTR_s00183p00019870
gene317	57.33	4e-141	418	eukaryotic translation initiation factor 5
gene320	76.77	0	588	hypothetical protein D910_03931
gene322	35.28	3e-70	237	lactation elevated protein 1
gene329	45.79	1e-107	337	vang-like protein 2
gene338	65.56	0	518	26S proteasome non-ATPase regulatory subunit 11
gene352	70.08	2e-137	396	2-amino-3-carboxymuconate-6-semialdehyde decarboxylase-like
gene353	50	3e-117	367	coiled-coil domain-containing protein lobo homolog
gene354	63.96	2e-95	294	general transcription factor IIH subunit 4-like, partial
gene355	74.23	3e-131	384	putative tRNA (cytidine(32)/guanosine(34)-2'-O)-methyltransferase-like
gene360	46.8	2e-113	348	major facilitator superfamily domain-containing protein 5
gene362	69.29	2e-138	409	Phosphoenolpyruvate phosphomutase
gene366	63.47	6e-89	289	frizzled-8
gene372	67.21	4e-51	174	tyrosine hydroxylase 2, partial
gene373	66.86	6e-80	251	cysteine protease ATG4B-like, partial
gene378	73.1	1e-83	259	BTB/POZ domain-containing protein 2-like
gene382	60.18	6e-81	290	mitogen-activated protein kinase kinase kinase 1
gene385	57.11	3e-159	464	GDP-fucose protein O-fucosyltransferase 2-like
gene388	45.75	1e-35	139	U3 small nucleolar RNA-associated protein 7, variant 2
gene389	49.4	8e-130	390	retinoid-inducible serine carboxypeptidase
gene394	56	0	608	putative beta-carotenoid oxygenase
gene395	70.22	3e-137	404	KDEL motif-containing protein 1
gene402	74.9	7e-147	419	40S ribosomal protein S4-like
gene404	57	0	576	hypothetical protein
gene407	65.92	5e-119	364	nuclear respiratory factor 1
gene416	58.69	4e-156	455	glycoprotein endo-alpha-1,2-mannosidase
gene428	83.78	2e-12	70.1	replication factor C subunit 2
gene435	51.96	4e-97	300	alpha-(1,3)-fucosyltransferase 10-like
gene444	55.59	2e-139	415	BTB/POZ domain-containing protein 9-like, partial
gene445	57.36	3e-44	163	hypothetical protein D910_00639, partial
gene450	69.23	6e-11	68.2	peptidyl-prolyl cis-trans isomerase-like 2-like, partial
gene452	53.85	1e-160	473	cytosol aminopeptidase-like
gene455	65.14	6e-169	491	integrator complex subunit 11
gene460	83.33	2e-144	413	proteasome subunit alpha type-2
gene461	92.17	4e-71	224	proteasome subunit beta type-5
gene467	65.41	5e-91	276	protein arginine N-methyltransferase 1-like, partial
gene469	85.96	7e-25	101	erythrocyte band 7 integral membrane protein
gene472	75.22	1e-49	179	dihydrolipoyl dehydrogenase, mitochondrial
gene476	56.39	5e-140	411	enoyl-CoA delta isomerase 2, mitochondrial
gene478	57.88	5e-157	467	WDR70 WD repeat domain 70
gene479	43.55	8e-60	215	autophagy-related protein 9A
gene495	56.07	4e-30	134	protein dopey-2-like, partial
gene496	64.88	1e-65	233	YEATS domain-containing protein 2-like
gene498	82.17	5e-147	462	hypothetical protein D910_10583
gene512	71.57	4e-95	295	LOW QUALITY PROTEIN: family with sequence similarity 46, member A
gene521	45.18	2e-140	424	nuclear RNA export factor 1
gene523	71	0	592	uncharacterized protein
gene526	66.67	0.41	37.4	uridine-cytidine kinase 2-b
gene527	74.12	1e-142	419	N6-adenosine-methyltransferase 70 kDa subunit
gene531	79.12	9e-100	304	fructose-bisphosphate aldolase C-B-like
gene538	60.82	3e-100	308	bisphosphoglycerate-independent phosphoglycerate mutase
gene539	73.61	2e-28	108	uncharacterized protein C4orf22 homolog
gene543	37	4e-133	414	hypothetical protein
gene545	42.19	7e-85	269	coiled-coil domain-containing protein 113
gene551	53.96	2e-98	299	protein YIF1B
gene555	76.86	5e-143	410	mitotic checkpoint protein BUB3
gene563	37	4e-85	286	uncharacterized protein LOC100205990
gene565	62.91	7e-113	334	exosome complex component RRP4
gene567	52	2e-152	448	hypothetical protein
gene570	45.82	7e-113	343	glucose-fructose oxidoreductase domain-containing protein 1
gene589	60.69	8e-65	213	soluble calcium-activated nucleotidase 1
gene590	66.29	1e-125	365	cell cycle checkpoint protein RAD1
gene594	48.48	3e-08	58.2	radial spoke head 10 homolog B-like
gene598	79	0	664	predicted protein
gene599	47.24	8e-139	422	transcription factor 25-like
gene605	80	1e-123	355	proteasome subunit beta type-3-like
gene607	59.19	4e-102	313	succinyl-CoA ligase [GDP-forming] subunit beta, mitochondrial-like
gene609	79.3	9e-139	396	proteasome subunit alpha type-6
gene611	47.57	5e-51	174	phosphonoacetaldehyde hydrolase
gene616	73.17	3e-12	70.5	AP-3 complex subunit mu-1-like
gene617	48.37	7e-150	444	ADP-dependent glucokinase-like
gene640	72.47	2e-109	329	radial spoke head protein 3 homolog, partial
gene642	68.87	6e-43	158	glycerol-3-phosphate acyltransferase 4
gene643	60.25	6e-67	213	syntenin-2, partial
gene659	41.97	2e-117	357	tetratricopeptide repeat protein 38
gene662	81.75	1e-67	213	ras-related protein Rab-18
gene664	57.78	1e-100	304	hypothetical protein D910_07068
gene666	56.59	6e-39	148	LOW QUALITY PROTEIN: nicalin, partial
gene682	56.79	1e-26	108	WD repeat and FYVE domain-containing protein 2-like
gene697	62.5	3e-20	92	mitochondrial import inner membrane translocase subunit TIM44-like
gene704	55	4e-91	299	Pyruvate dehydrogenase [acetyl-transferring]]-phosphatase 2, mitochondrial
gene707	65.71	3e-05	50.1	Similar to Solute carrier family 25 member 40
gene712	79.87	5e-91	271	glucose-induced degradation protein 4 homolog
gene720	71.88	3e-08	56.6	aspartyl aminopeptidase
gene723	56.69	1e-45	160	G2/mitotic-specific cyclin-B1-like
gene728	65.17	3e-97	293	U3 small nucleolar ribonucleoprotein protein IMP4-like
gene734	58.85	1e-78	244	CCR4-NOT transcription complex subunit 8
gene742	51.22	7e-08	59.3	coiled-coil domain-containing protein 81
gene744	56.14	5e-114	338	ester hydrolase C11orf54 homolog
gene748	82.81	2e-29	122	NLS-YFP-Lim4-CFP
gene750	39.69	4e-54	189	prenylcysteine oxidase-like
gene762	41	4e-79	255	alkylated DNA repair protein alkB homolog 1-like
gene763	73.25	4e-123	358	UDP-glucose 4-epimerase
gene774	44.08	9e-118	362	oxidative stress-induced growth inhibitor 2
gene783	56.52	9e-75	248	apoptosis-inducing factor 1, mitochondrial-like
gene786	73.58	3e-103	305	40S ribosomal protein S6
gene796	56.9	0	627	negative elongation factor D-like
gene800	66.54	7e-96	296	phosphate carrier protein, mitochondrial
gene801	49.16	1e-97	297	methionine adenosyltransferase 2 subunit beta
gene802	80.37	4e-96	285	GTP cyclohydrolase 1
gene814	66.01	6e-104	308	WD repeat-containing protein 82
gene816	42.89	8e-128	390	sialate O-acetylesterase
gene820	55.32	1e-80	252	KRR1 small subunit processome component homolog
gene821	56	2e-20	93.6	V-type proton ATPase subunit C 2
gene831	44.86	1e-86	272	nucleoporin Nup43
gene839	81.11	7e-99	292	ras-related protein Ral-B
gene851	69	2e-102	306	cytochrome b5 domain-containing protein 1-like
gene856	58	5e-109	329	G1/S-specific cyclin-D2
gene858	44.25	2e-93	291	diphthamide biosynthesis protein 2-like
gene860	48.93	2e-65	213	general transcription factor IIE subunit 2-like
gene865	55.6	3e-104	310	proteasome subunit beta type-4-like
gene866	47.04	3e-94	297	programmed cell death protein 4-like isoform X2
gene883	56.2	4e-101	310	N-acyl-phosphatidylethanolamine-hydrolyzing phospholipase D
gene885	80.12	2e-92	275	Chain A, Crystal Structure Of Wild-type Rab11 Complexed To Fip2
gene886	54.84	5e-19	87.8	BTB/POZ domain-containing protein KCTD6
gene891	53.24	2e-106	322	nuclear inhibitor of protein phosphatase 1
gene893	55.29	1e-91	284	ribosome biogenesis regulatory protein homolog
gene916	71.52	2e-79	241	ras-related protein Rab-24-like
gene919	54.29	8e-17	80.9	factor VIII intron 22 protein, partial
gene932	86.82	3e-77	233	ubiquitin-conjugating enzyme E2 N
gene940	59.04	1e-75	239	arfaptin-2
gene943	56.92	7e-36	146	nuclear pore complex protein Nup107
gene944	61.62	3e-81	252	phytanoyl-CoA dioxygenase, peroxisomal
gene945	95.56	8e-20	91.3	transcriptional enhancer factor TEF-3
gene959	57.75	3e-21	95.5	dual specificity protein phosphatase 6
gene963	59.3	3e-113	338	ribosome production factor 2 homolog
gene974	54.51	4e-99	297	UPF0160 protein MYG1, mitochondrial, partial
gene979	64.67	2e-75	232	GTP-binding protein Rheb
gene981	63.64	2e-94	285	TP53-regulating kinase-like
gene985	72.32	3e-84	253	ras-related protein Rap-2a
gene992	65.52	2e-36	135	S-methyl-5'-thioadenosine phosphorylase-like
gene997	68.97	9e-05	46.6	putative chaperone protein DnaJ
gene1003	77.7	3e-77	233	60s ribosomal protein l27a
gene1024	53	4e-90	278	voltage-dependent anion-selective channel protein 2
gene1031	41.95	7e-38	152	targeting protein for Xklp2
gene1042	57.3	6e-70	226	tRNA methyltransferase 10 homolog A
gene1050	47.65	2e-75	248	adenylyl cyclase-associated protein 1
gene1054	56.9	2e-08	57.4	dnaJ homolog subfamily B member 8
gene1060	82.35	7e-49	179	hypothetical protein D910_04853, partial
gene1082	82.3	8e-126	363	eukaryotic translation initiation factor 6-like, partial
gene1083	79.63	7e-22	94.4	uncharacterized protein LOC102054319
gene1099	42.9	9e-86	270	tetratricopeptide repeat protein 5
gene1106	54.4	4e-44	151	Golgi SNAP receptor complex member 1
gene1112	42	5e-83	270	ras association domain-containing protein 1-like
gene1125	68.42	3e-10	63.2	glycosyltransferase-like domain-containing protein 1
gene1130	80.77	2e-07	55.8	hypothetical protein D910_02310, partial
gene1135	52.76	7e-26	110	CD2 antigen cytoplasmic tail-binding protein 2-like
gene1141	82.35	6e-24	94.7	60S ribosomal protein L13a-like, partial
gene1146	91	6e-74	226	gamma-aminobutyric acid receptor-associated protein-like 2-like
gene1147	54	5e-81	254	cytochrome b561-like
gene1164	51.87	2e-92	283	LOW QUALITY PROTEIN: lysosomal thioesterase PPT2-A-like
gene1175	64.15	2e-34	136	hypothetical protein D910_03531
gene1179	74.07	9e-21	87	eukaryotic translation initiation factor 5A-1-like, partial
gene1191	42.35	6e-76	241	LOW QUALITY PROTEIN: vesicle-trafficking protein SEC22a-like
gene1194	43	7e-92	295	trichohyalin-like
gene1195	39	4e-67	231	repulsive guidance molecule A-like
gene1197	77.78	1e-143	411	proteasome subunit alpha type-1
gene1211	46.89	1e-59	201	synapse-associated protein 1
gene1215	57.03	7e-155	452	legumain
gene1216	77.78	3e-12	70.1	BTB/POZ domain-containing protein KCTD20
gene1219	76.86	2e-55	178	60S ribosomal protein L35
gene1225	46.9	2e-30	117	neuferricin-like
gene1234	64.29	2e-07	50.4	thioredoxin domain-containing protein 8-like
gene1236	71.93	3e-21	92.8	uncharacterized protein LOC102187703
gene1240	45	1e-70	234	uncharacterized aminotransferase C660.12c-like
gene1243	51.79	2e-80	254	isoaspartyl peptidase/L-asparaginase-like isoform X1
gene1254	60.2	4e-124	364	mitochondrial carnitine/acylcarnitine carrier protein-like
gene1257	49	6e-116	356	threonine synthase-like 2 isoform X3
gene1259	42.19	9e-07	54.3	Calcium-binding mitochondrial carrier protein
gene1261	43	1e-58	194	transmembrane emp24 domain-containing protein 7-like
gene1270	64.41	1e-65	221	muskelin isoform X9
gene1273	69.64	3e-44	149	charged multivesicular body protein 1a
gene1292	50.47	7e-30	113	gamma-secretase subunit APH-1A-like, partial
gene1295	59.52	2e-09	58.9	inositol hexakisphosphate kinase 2-like, partial
gene1305	47.92	0.0003	47	hypothetical protein D910_12511
gene1308	46.32	2e-19	96.3	sphingomyelin phosphodiesterase 4-like
gene1311	58.54	1e-51	171	receptor expression-enhancing protein 6
gene1319	39	4e-52	180	Polyglutamine-binding protein 1
gene1325	59.04	7e-108	324	LOW QUALITY PROTEIN: uroporphyrinogen decarboxylase-like
gene1326	54.23	2e-42	150	microtubule-associated protein RP/EB family member 1-like
gene1339	53.62	1e-18	85.5	39S ribosomal protein L15, mitochondrial
gene1347	47.57	2e-76	240	sin3 histone deacetylase corepressor complex component SDS3
gene1348	47.17	3e-10	58.9	isochorismatase domain-containing protein 2, mitochondrial
gene1369	73.33	431	24.6	hypothetical protein P615_21255
gene1376	81.82	4e-69	213	40S ribosomal protein S12
gene1379	44.94	2e-58	197	nucleoporin NUP53-like
gene1381	61.36	2e-11	62	tumor necrosis factor alpha-induced protein 8-like protein 1
gene1382	77.11	6e-36	131	cyclic AMP-responsive element-binding protein 1
gene1385	56.79	1e-20	91.3	protein IMPACT
gene1392	76	7e-22	87.8	60S ribosomal protein L9-like, partial
gene1393	68.35	2e-27	112	Similar to Malate dehydrogenase, cytoplasmic
gene1394	35	5e-42	155	zinc finger CCCH domain-containing protein 10-like
gene1405	52	8e-65	210	WASH complex subunit CCDC53
gene1407	50.67	7e-11	67	U3 small nucleolar RNA-associated protein 14 homolog A
gene1413	66.67	4e-44	151	estradiol 17-beta-dehydrogenase 8
gene1422	52.63	2e-15	72.8	ras-related protein Rap-1b-like
gene1432	46.86	3e-52	174	calcyclin-binding protein
gene1441	76.47	2e-10	62.4	uncharacterized protein LOC102065257, partial
gene1443	48.13	4e-56	182	RWD domain-containing protein 4
gene1444	54.35	2e-20	93.6	transcription factor AP-1-like
gene1450	94.78	5e-77	231	hypothetical protein D910_01827
gene1462	59.2	5e-33	122	ATP synthase subunit delta, mitochondrial
gene1463	91.57	3e-48	164	uncharacterized protein LOC102111343
gene1483	50	9e-51	168	tetratricopeptide repeat protein 36-like
gene1486	62.64	3e-30	112	histone deacetylase complex subunit SAP18
gene1488	35.67	8e-96	306	LOW QUALITY PROTEIN: 26S proteasome non-ATPase regulatory subunit 5, partial
gene1493	54.48	5e-45	160	ubiquinone biosynthesis protein COQ9, mitochondrial-like
gene1497	95.08	6e-33	127	aminopeptidase Q-like
gene1501	70.49	2e-23	95.9	density-regulated protein-like protein
gene1505	79.49	2e-15	73.6	superoxide dismutase [Mn], mitochondrial
gene1507	88	2e-44	147	protein BUD31 homolog
gene1508	58.87	1e-51	179	E3 ubiquitin-protein ligase KCMF1-like
gene1525	37.5	0.0004	43.9	apolipoprotein D-like
gene1527	53.77	1e-32	136	bromodomain-containing protein 9
gene1528	36.25	2e-46	166	MOSC domain-containing protein 1, mitochondrial-like
gene1529	32.16	2e-19	94	sorting nexin-14-like
gene1532	62.07	2e-20	89	nanos homolog 2
gene1535	52.5	5e-47	159	sepiapterin reductase
gene1541	69.83	4e-90	275	protein DDI1 homolog 2
gene1545	82.93	2e-13	67.8	nascent polypeptide-associated complex subunit alpha, muscle-specific form-like
gene1546	28.75	7e-12	71.2	transmembrane protein 214
gene1552	47.34	5e-42	147	Ribosomal RNA-processing protein 7 homolog A
gene1553	63.64	7e-15	72.8	tubulin polymerization-promoting protein family member 2
gene1557	44.62	2e-08	57	methyl-CpG-binding domain protein 4-like
gene1586	53.06	8e-06	53.9	axin-1-like isoform X1
gene1598	68.7	3e-46	156	charged multivesicular body protein 4c-like
gene1619	51.16	2e-08	56.6	UPF0472 protein C16orf72 homolog, partial
gene1627	42.69	1e-25	105	RRP15-like protein
gene1648	74.89	1e-126	382	bifunctional purine biosynthesis protein PURH
gene1672	63	7e-50	168	predicted protein
gene1674	45.45	2e-22	93.2	cytochrome c oxidase subunit 4 isoform 2, mitochondrial-like
gene1682	52.63	1e-41	149	saccharopine dehydrogenase-like oxidoreductase
gene1685	42.06	4e-24	97.8	FUN14 domain-containing protein 1-like
gene1691	47.75	3e-26	105	cation transport regulator-like protein 1-like
gene1700	63.16	5e-23	93.2	adrenodoxin, mitochondrial-like
gene1709	70.49	2e-25	100	CDGSH iron-sulfur domain-containing protein 1-like
gene1729	40.56	1e-18	87.8	hsp70-binding protein 1 isoform X2
gene1733	53.92	6e-32	117	transmembrane protein 208
gene1737	44.53	1e-22	97.1	androgen-dependent TFPI-regulating protein
gene1745	34	4e-25	105	40S ribosomal protein S8
gene1763	48.48	1e-13	68.9	translocon-associated protein subunit delta
gene1795	87.5	41026	20.4	LOW QUALITY PROTEIN: zinc finger protein 850
gene1805	45.95	2e-17	81.3	transcription cofactor vestigial-like protein 4
